# Supplementary material
Source: Springer Nature journal article supplement (https://www.springermedizin.de/resource/supplementary/12913_2006_349_MOESM1_ESM.pdf/9535148)
Supplement: MOESM1 [file 9535148]

## Anticoagulation Clinic Time Survey

Date: \_\_\_\_ / \_\_\_\_ / \_\_\_\_

Time check in at lab: \_\_\_\_\_ Time out of lab: \_\_\_\_\_

Time check in at Internal Medicine: \_\_\_\_\_

Time nurse checks blood pressure: \_\_\_\_\_

Time put in exam room: \_\_\_\_\_

Time seen by pharmacist: \_\_\_\_\_

Time check out: \_\_\_\_\_

*Please complete and give to receptionist once you check out*

## Pain Clinic Time Survey

Date: \_\_\_\_ / \_\_\_\_ / \_\_\_\_ New/Return

Appointment time: \_\_\_\_\_

Time check in at Internal Medicine: \_\_\_\_\_

Time in lab: \_\_\_\_\_ Time out of lab: \_\_\_\_\_

Time nurse collects urine sample: \_\_\_\_\_

Time put in exam room: \_\_\_\_\_

Time with program assistant: Start \_\_\_\_\_ End \_\_\_\_\_

Time seen by student: Start \_\_\_\_\_ End \_\_\_\_\_

Time seen by pharmacist: Start \_\_\_\_\_ End \_\_\_\_\_

*Please complete and give to receptionist once you check out*
